# Supplementary material for: Novel R Pipeline for Analyzing Biolog Phenotypic Microarray Data
Source: PLOS journal article supplement (doi:10.1371/journal.pone.0118392), 2015-03-18
Supplement: S7 (10.1371/journal.pone.0118392.s007) [file journal.pone.0118392.s007]

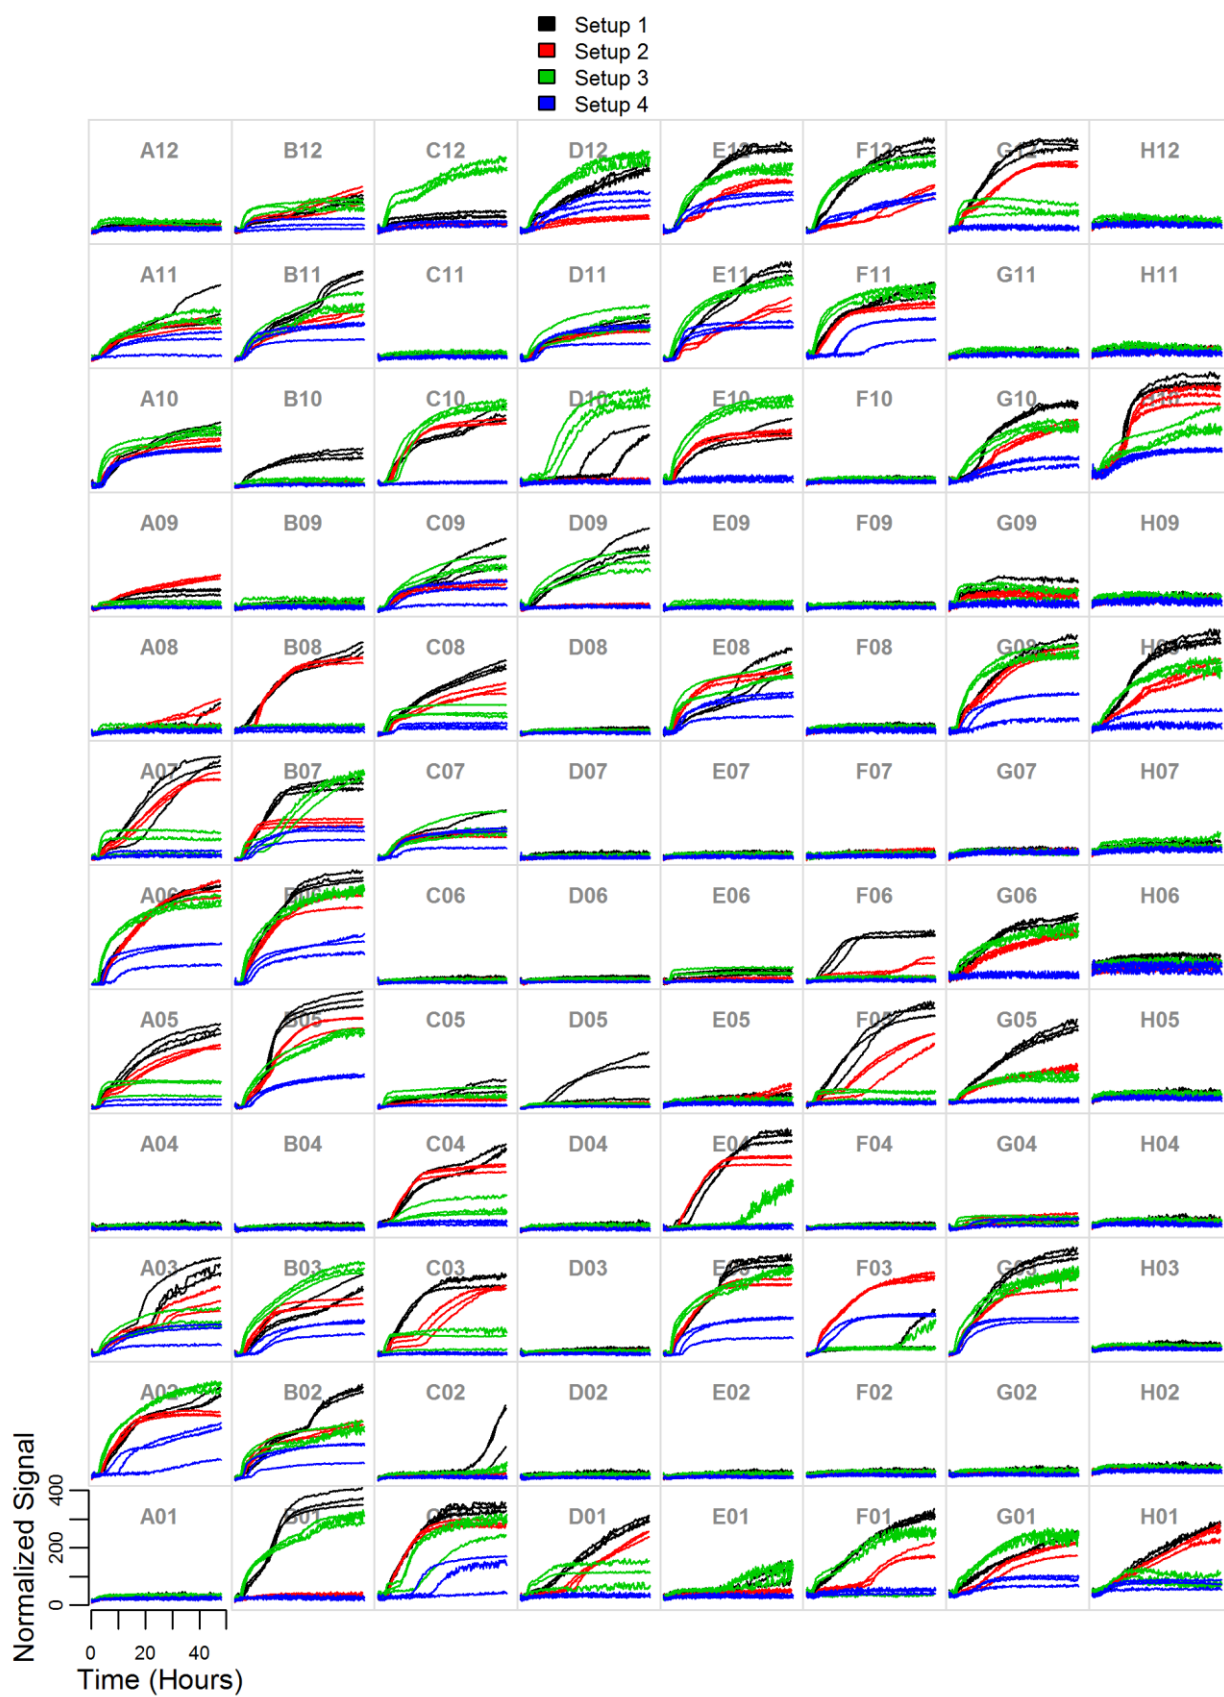

**Figure S7. Normalized PM profiles substrate-wise.** Lines represent normalized metabolic profiles of two *Yersinia enterocolitica* strains (53/03, 8081c) measured at two temperatures (28 and 37 °C) on 12 PM01 plates. Four experimental setups: 1 (28 °C, 53/03), 2 (28 °C, 8081c), 3 (37 °C, 53/03) and 4 (37 °C, 8018c), are separated by different colours. Each panel represents one of the 96 substrates on a PM01 plate. Time in hours and the normalized metabolic signals are represented on the x- and y-axes, respectively.
